# Supplementary material for: Long Stent Implantation on the Left Anterior Descending Coronary Artery at a Follow-Up of More Than Five Years
Source: MDPI journal article supplement (doi:10.3390/jcm13010210), 2023-12-29
Supplement: s1 [file s1]

**Table S1. Complete comparison of baseline and procedural characteristics of patients with and without accomplished FU.**

| <b>Characteristic</b>           | <b>Group with FU<br/>(n 531/802; 66%)</b> | <b>Without FU<br/>(n 271/802; 34%)</b> | <b>Statistic</b> |
|---------------------------------|-------------------------------------------|----------------------------------------|------------------|
| Male sex/total (%)              | 447/531 (84.3)                            | 148/271 (85.6)                         | p=0.775          |
| Mean Age, y                     | 66 ± 11                                   | 63 ± 12.2                              | p<0.001          |
| Hypertension (%)                | 322/531 (60.6)                            | 155/271 (57.2)                         | p=0.384          |
| Diabetes (%)                    | 140/531 (25.5)                            | 58/271 (21.4)                          | p=0.123          |
| On Insulin                      | 39/531 (6.9)                              | 12/271 (4.4)                           |                  |
| Hyperlipidaemia (%)             | 330/531 (63.2)                            | 158/271 (58.3)                         | p=0.292          |
| Prior CABG (%)                  | 61/531 (11.5)                             | 15/271 (5.5)                           | p=0.060          |
| Prior PCI (%)                   | 202/531 (38)                              | 77/271 (28.4)                          | p=0.007          |
| Peripheral Vascular Disease (%) | 44/531 (8.3)                              | 17/271 (6.3)                           | p=0.310          |
| Previous MI (%)                 | 223/531 (42)                              | 117/271 (43.2)                         | p=0.712          |
| LVEF %                          | 53.1                                      | 54.5                                   | p=0.230          |
| Stable Angina (%)               | 391/531 (73.7)                            | 216/271 (79.7)                         | p=0.580          |
| Unstable Angina (%)             | 9/531 (1.6)                               | 2/271 (0.8)                            | p=0.271          |
| STEMI/NSTEMI (%)                | 132/531 (24.8)                            | 53/271 (19.5)                          | p=0.920          |
| <b>Complete Procedural Data</b> |                                           |                                        |                  |
| Mean Stent Length, n ± sd       | 41.5 ± 12.8 mm                            | 39.97 ± 12 mm                          | p=0.182          |

|                                            |             |             |         |
|--------------------------------------------|-------------|-------------|---------|
| Median Stent Length                        | 36          | 33          |         |
| Minimal Stent Length                       | 31          | 31          |         |
| Maximal Stent Length                       | 110         | 99          |         |
| Mode Stent Length                          | 33          | 33          |         |
| Mean Stent Diameter                        | 3.09 ± 0.37 | 3.14 ± 0.38 | p=0.080 |
| LAD ostial-proximal, n (%)                 | 189 (36)    | 110 (40.5)  | p=0.532 |
| Complex PCI Features<br>[ref. (94)], n (%) | 512 (96.4)  | 240 (88.6)  | p<0.001 |
| 3 Lesions, n (%)                           | 256 (48.2)  | 202 (74.5)  | p<0.001 |
| 3 Vessels, n (%)                           | 167 (31.4)  | 52 (19.2)   | p=0.607 |
| CTO, n (%)                                 | 106 (20)    | 38 (14)     | p=0.380 |
| Bifurcation (2 stents), n (%)              | 128 (24.1)  | 96 (35.5)   | p<0.001 |
| Atherectomy, n (%)                         | 40 (3.2)    | 14 (5.2)    | p=0.173 |
| Cutting Balloon, n (%)                     | 40 (7.5)    | 25 (9.2)    | p=0.407 |
| IVUS/OCT, n (%)                            | 225 (42.3)  | 133 (49.1)  | p=0.710 |
| ACC/AHA C, n (%)                           | 387 (72.8)  | 146 (53.8)  | p<0.001 |
| Post-dilatation on all stents<br>n (%)     | 255 (48)    | 170 (63)    | p<0.001 |
| Perforation, n (%)                         | 4 (0.7)     | 0 (0)       | p=0.152 |
| Acute vessel occlusion, n (%)              | 1 (0.2)     | 4 (1.5)     | p=0.028 |
| IABP, n (%)                                | 41 (8)      | 8 (2.9)     | p=0.080 |
| Intra-hospital MI, n (%)                   | 79 (15)     | 33 (12.2)   | p=0.297 |
